# Supplementary material for: A rotary plasmonic nanoclock
Source: PubMed Central journal article supplement (PMC6881389; doi:10.1038/s41467-019-13444-3), 2019-11-27
Supplement: 41467_2019_13444_MOESM1_ESM.pdf [file 41467_2019_13444_MOESM1_ESM.pdf]

**Supplementary Information for**

**A rotary plasmonic nanoclock**

Xin et al.

Correspondence to: [na.liu@kip.uni-heidelberg.de](mailto:na.liu@kip.uni-heidelberg.de)

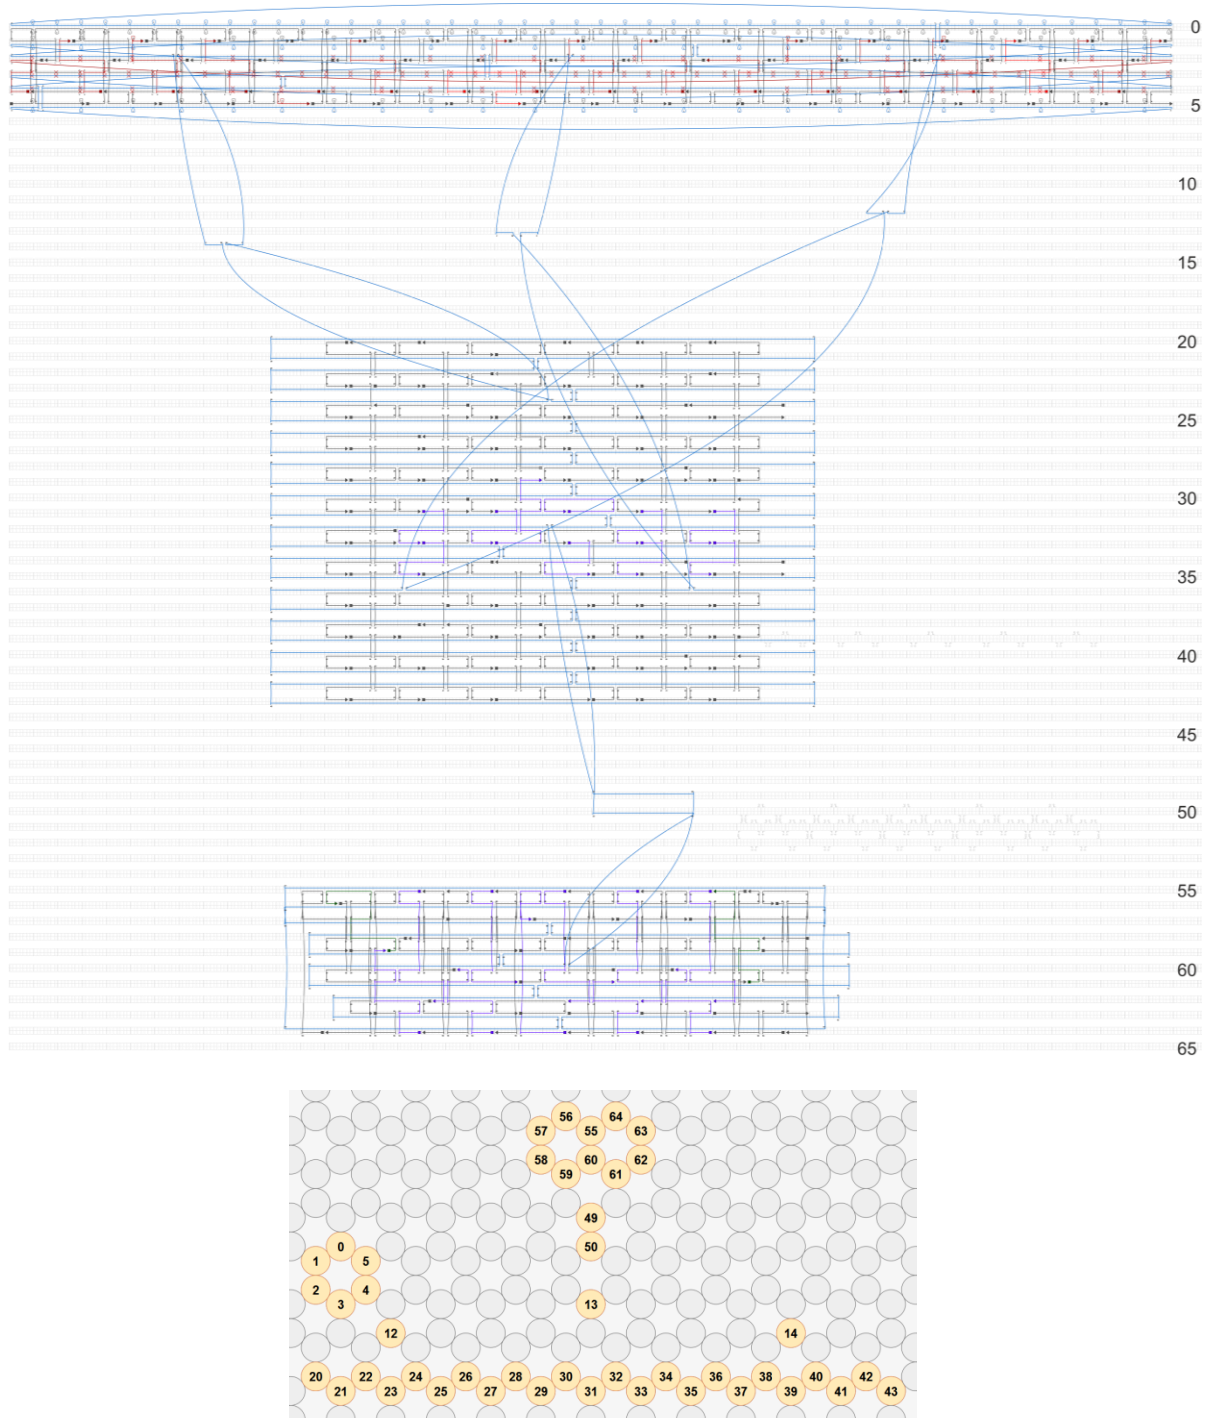

**Supplementary Figure 1** | Strand routing diagram of the DNA origami structure for the stepwise plasmonic nanoclock. Staples for two foot strands (green), 16 footholds (red), 20 capture strands (violet).

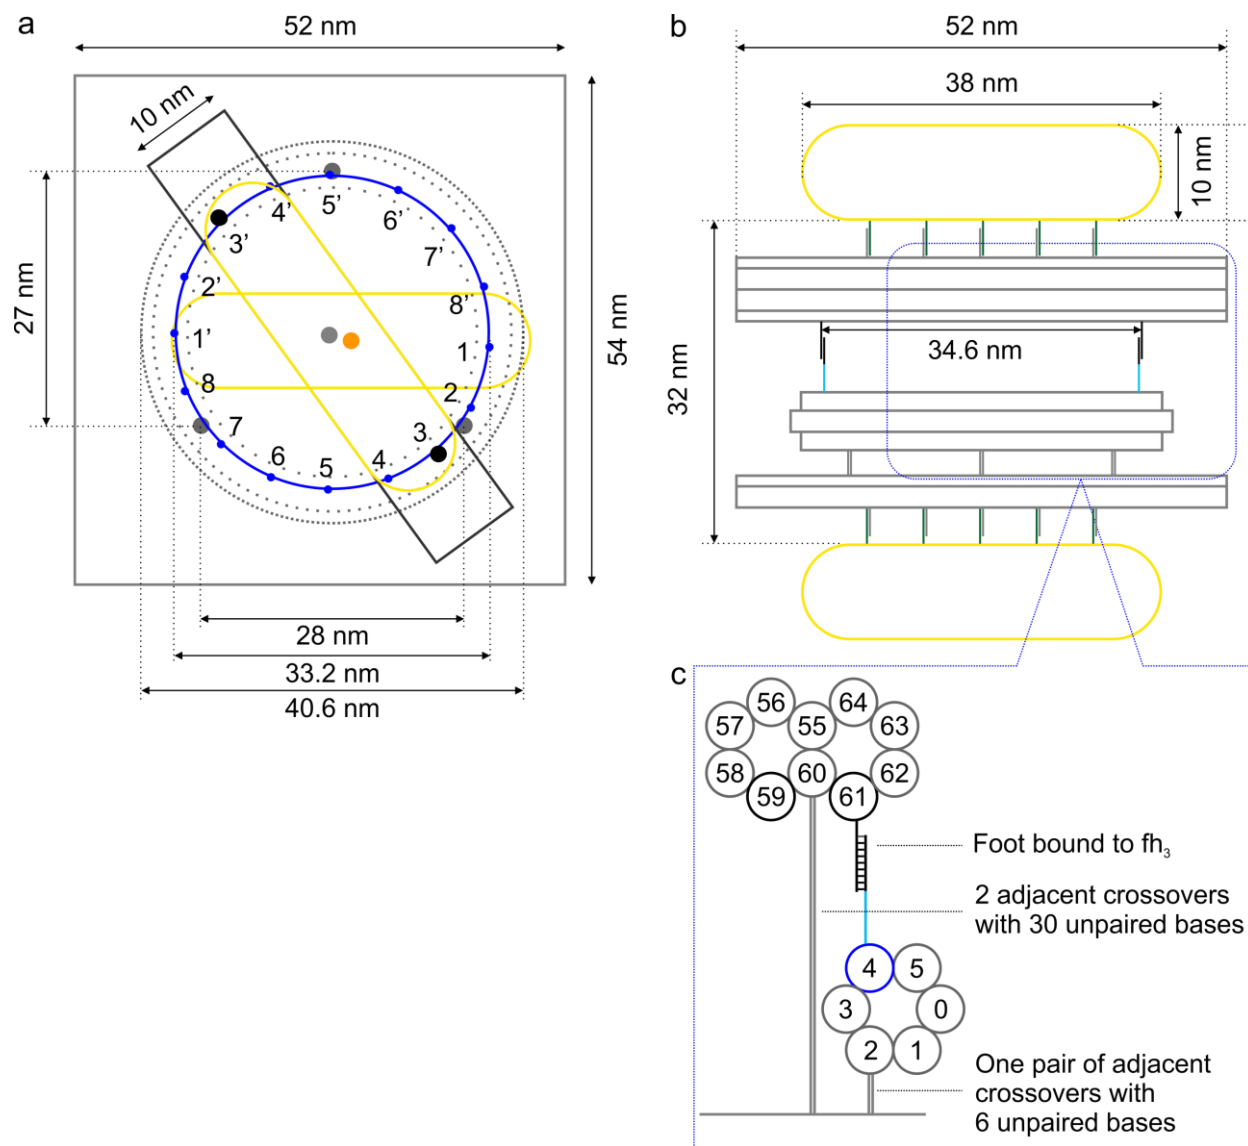

**Supplementary Figure 2** | Structural details of the stepwise plasmonic nanoclock. **a**, Top and **b**, Side views of the plasmonic nanoclock at position 3-3'. Three grey dots under the blue ring in the top view represent the positions of the three pairs of adjacent crossovers with 6 unpaired bases to connect the lower surface of the 6-helix ring and the upper surface of the single-layer plate. The grey dot in the center of the circle represents the position of 2 adjacent scaffold crossovers with 30 unpaired bases used to connect the centers of the 10-helix bundle and the single-layer plate, which are not shown in the side view. The orange dot is the center of the capturing strands extended from the bottom of the plate for attaching the stator AuNR. The orange dot and grey dot don't coincide with each other (the lateral distance between them is  $\sim 2.3$  nm), meaning the two AuNRs are not coaxial. The four circles in the top view represent the positions of the different helices in the ring. The crossovers used to immobilize the ring on the plate are distributed on helix 2 and the footholds are extended from helix 4. Both helices are along the blue circle in the top view. The origami bundle is about 10 nm in width and 52 nm in length. The two black dots along the diagonal direction of the rotor represent the two feet and coincide with the two small blue dots at position 3-3', meaning the two feet are bound to  $fh_3$  and  $fh_3'$ , respectively. The rotor is fixed at position 3-3'. **c**, Enlarged view of connections between ring track, rotor and plate. Scaffold crossovers are used to immobilize the rotor and ring on the plate. Meanwhile, the rotor and ring track are linked via foot-foohold interaction.

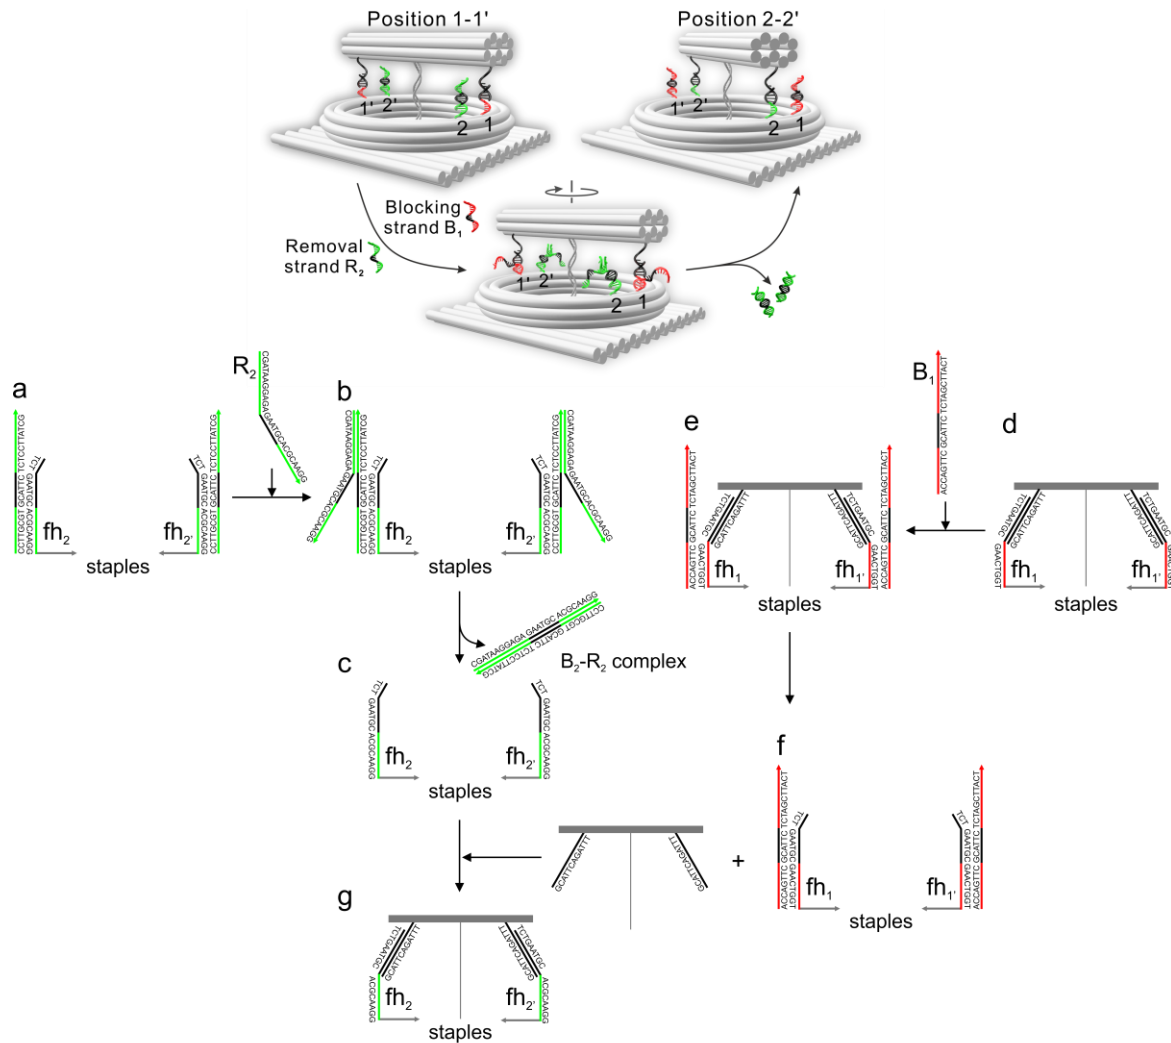

**Supplementary Figure 3** | Schematic illustration of the stepwise rotation from position 1-1' to position 2-2'. Each pair of the colored foothold strands on the ring track has a specific sequence. The two feet at the ends of the DNA bundle interact with a given pair of the footholds to determine the rotor position. For example, at the initial state the rotor is fixed at position 1-1'. At this state, the feet are bound to the red foothold pair ( $fh_1$  and  $fh_1'$ ) and all other footholds are blocked. **(a-c)**  $R_2$  is first added to activate position 2-2'.  $B_2$  is dissociated by  $R_2$  through branch migration, triggered by top domain of  $B_2$ , and the green pair of the footholds ( $fh_2$  and  $fh_2'$ ) is activated. **(d-f)** Next,  $B_1$  is added to block position 1-1'.  $fh_1$  and  $fh_1'$  are deactivated by  $B_1$  mediated through toehold domains on  $fh_1$  and  $fh_1'$ . **(g)** Two feet are free for capturing  $fh_2$  and  $fh_2'$  and driving the rotor to position 2-2'. As a result, one step of the clockwise rotation is accomplished.

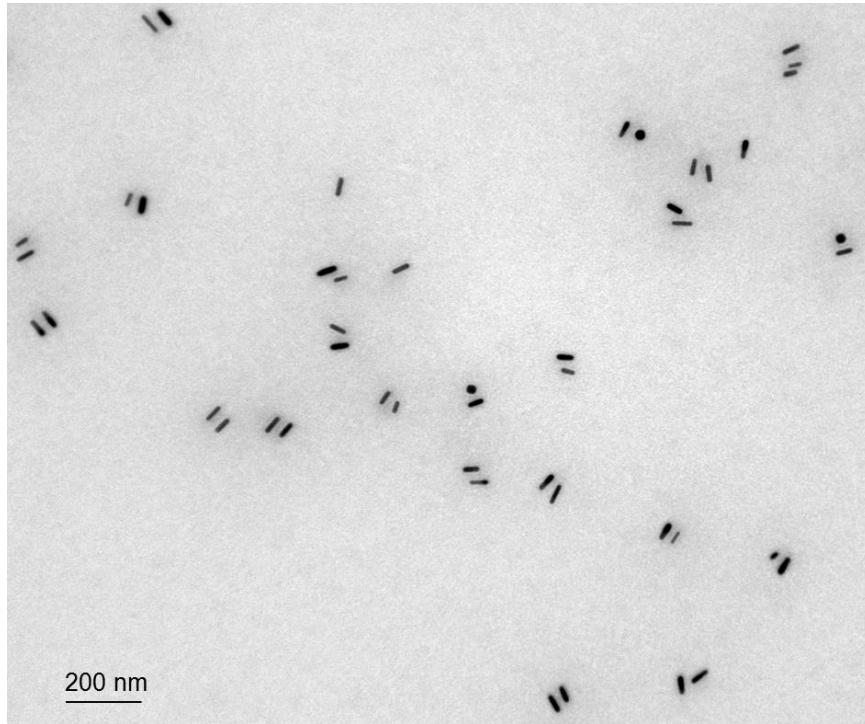

**Supplementary Figure 4** | TEM image of the stepwise plasmonic nanoclocks at position 1-1'.

Theoretical calculations were performed using commercial software COMSOL Multiphysics based on a finite element method. The origin of the bisignate CD is a consequence of Coulomb interaction between the dipoles of the two AuNRs. The CD signal was calculated as a difference in extinction for the left- and right-circularly polarized light. Since the plasmonic assemblies were dispersed in a solution, we carried out orientational averaging. Averaging over all possible orientations at defined light incidence is equivalent to averaging over all incident directions of light for a nanostructure with defined orientation. It has been demonstrated both analytically and numerically that averaging over six orthogonal directions of light incidence is sufficient to give accurate CD. In order to account for the inhomogeneous broadening due to the polydispersity of the AuNRs, the experimental dielectric function of Au was modified by including an additional term:

$$\varepsilon_{\text{effective}}(\omega) = \varepsilon_{\text{bulk}}(\omega) + \varepsilon_{\text{correction}}(\omega) \quad (1)$$

where the dielectric function of bulk Au,  $\varepsilon_{\text{bulk}}$  is from the Johnson and Christy values, and the correction term is introduced following a standard approach:

$$\varepsilon_{\text{correction}}(\omega) = \frac{\omega_p^2}{\omega^2 + i\omega\gamma} - \frac{\omega_p^2}{\omega^2 + i\omega\Gamma_{\text{broad}}} \quad (2)$$

$\omega_p = 8.754$  eV and  $\gamma = 0.0724$  eV are the Drude parameters, respectively.  $\Gamma_{\text{broad}}$  is 0.362 eV.

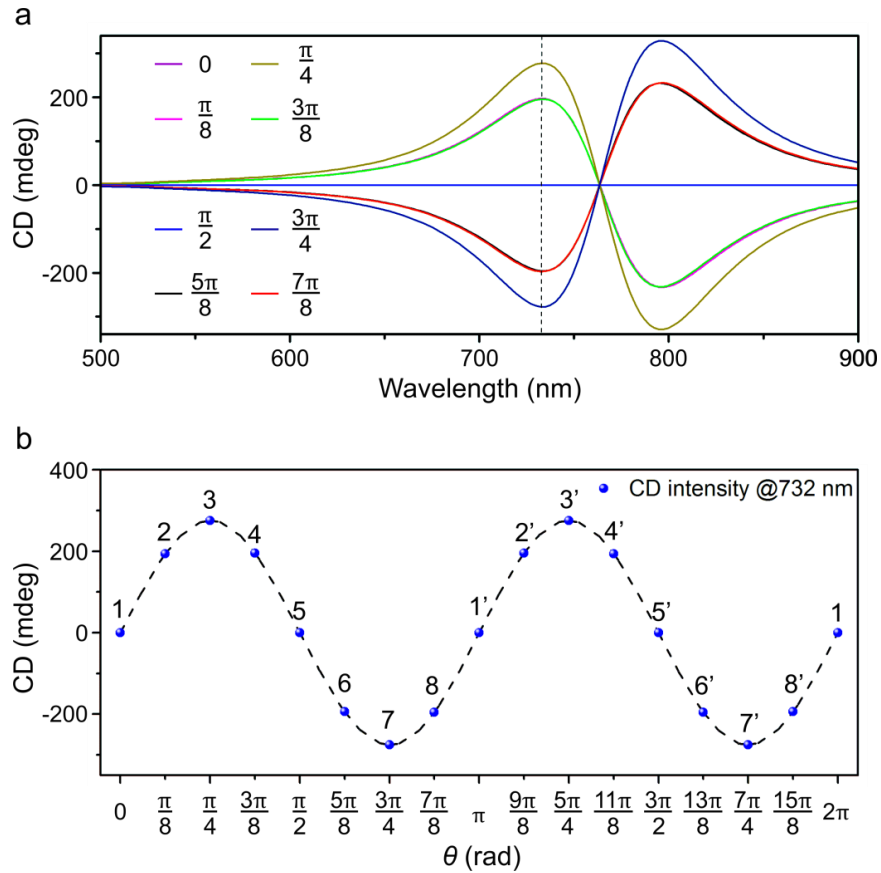

**Supplementary Figure 5** | Theoretical results for the 16 states of the plasmonic nanoclock. **a**, Calculated CD spectra at different rotation angles. **b**, CD intensity at 732 nm as a function of the rotation angle  $\theta$ .

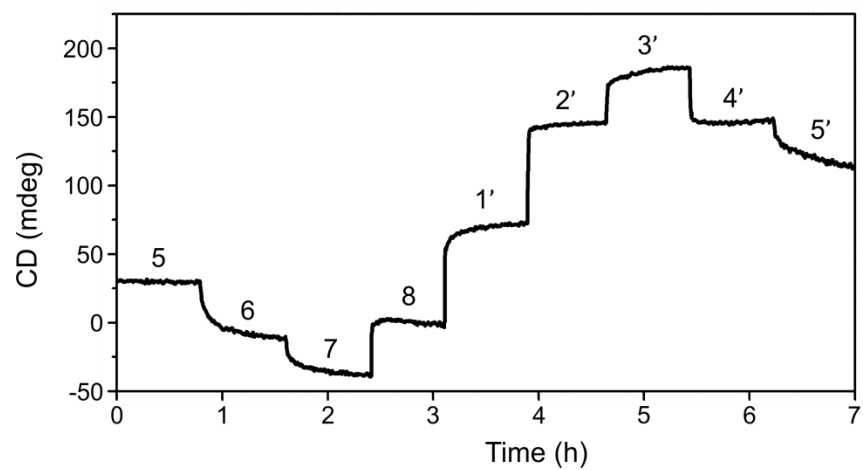

**Supplementary Figure 6** | Kinetics of the stepwise rotations driven by corresponding DNA fuels. The concentration of the AuNRs is about 1.2 nM. This result also indicates that the plasmonic nanoclock can perform stepwise rotations from any starting position.

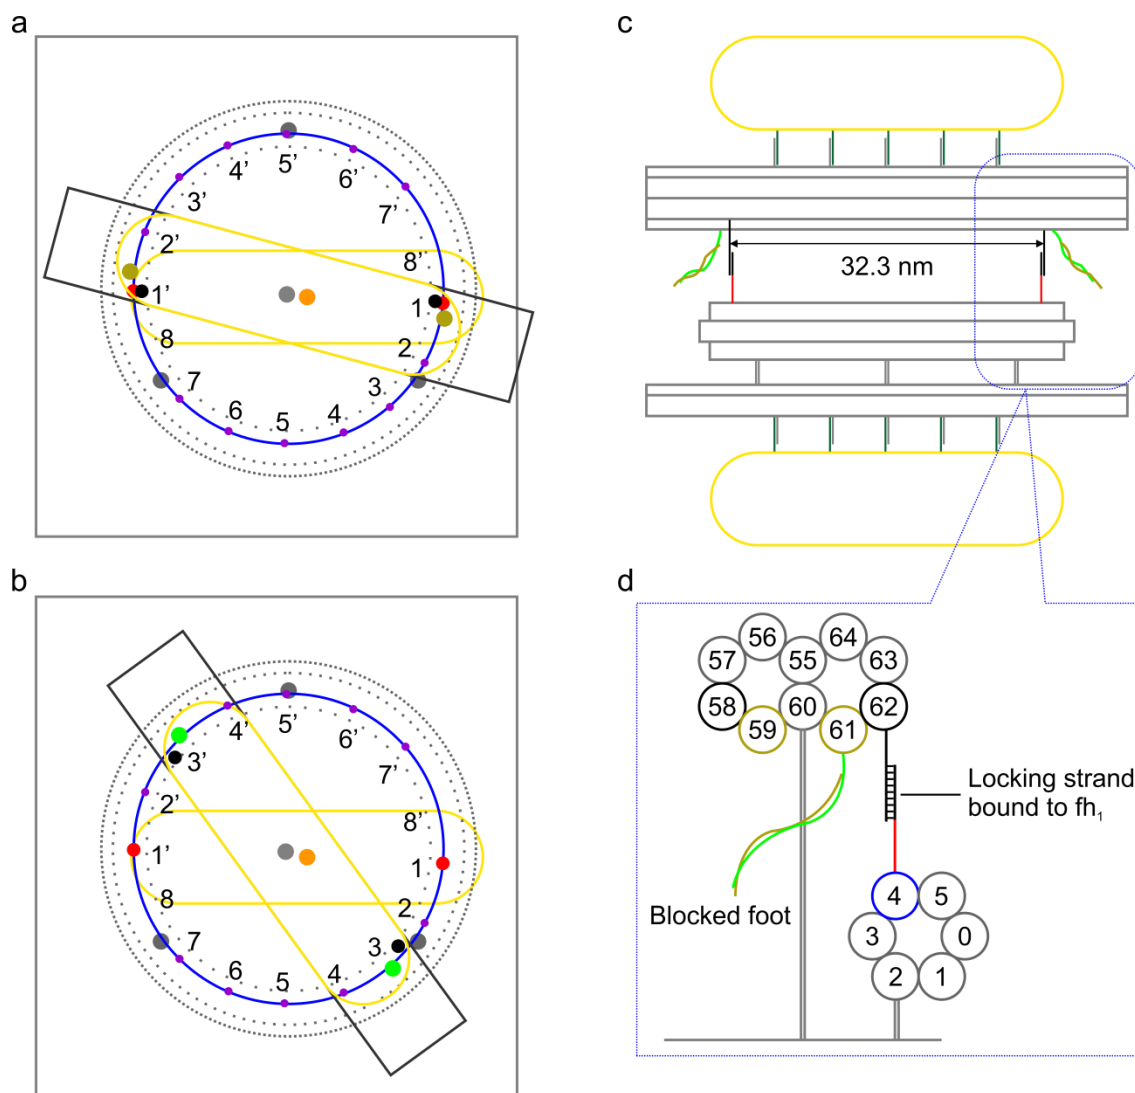

**Supplementary Figure 7** | Structural details of the autonomous plasmonic nanoclock. Top-view of the plasmonic nanoclock with track arrangement of 1–2–3–4–5–6–7 at **a**, position 1-1' and **b**, position 3-3'. Substrates (purple dots) as footholds are arranged on helix 4 (blue circle).  $Fh_1$  and  $fh_1'$  are working as lower locking strands (red dots). **a**, Two brown dots along the diagonal direction of the rotor represent that the DNAzyme feet are blocked. Two black dots next to the blocked feet represent the upper locking strands. They coincide with the red dots, which means the rotor is fixed at position 1-1' through hybridization between the upper and lower locking strands. **b**, Two green dots represent the positions of the two activated feet superimposed with the two small purple dots at position 3-3'. The feet are bound to the substrates at  $fh_3$  and  $fh_3'$ , and the rotor is fixed at position 3-3'. **c**, Side-view of the plasmonic nanoclock with track arrangement of 1–2–3–4–5–6–7 at position 1-1' and the feet are blocked. The distance between the two upper locking strands is about 32.3 nm. **d**, Enlarged view of connection between ring track and rotor by the locking strands on helix 62 and 4. The foot strand (green) on helix 61 is blocked by blocking strand b (brown).



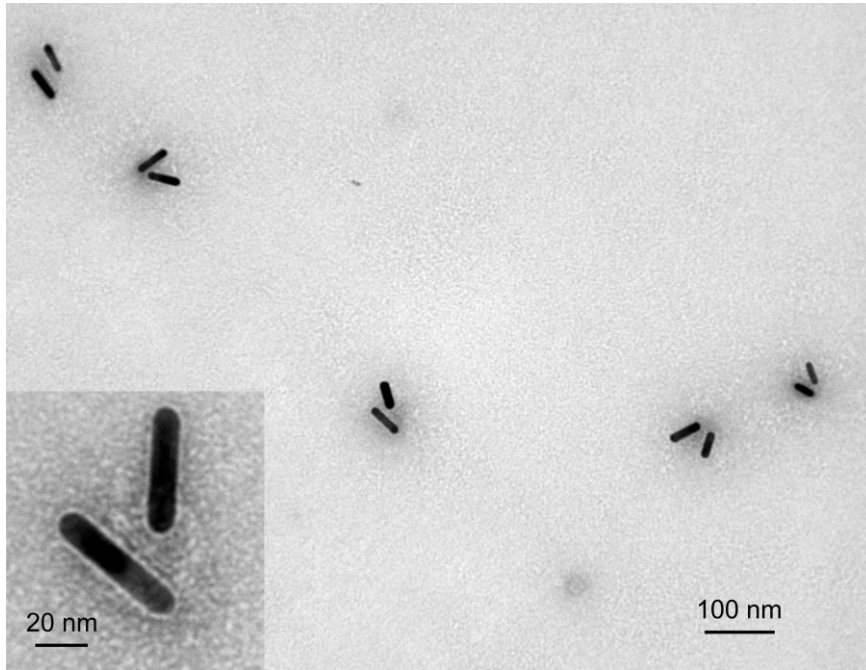

**Supplementary Figure 8** | TEM image of the autonomous plasmonic nanoclocks at position 1-1'.

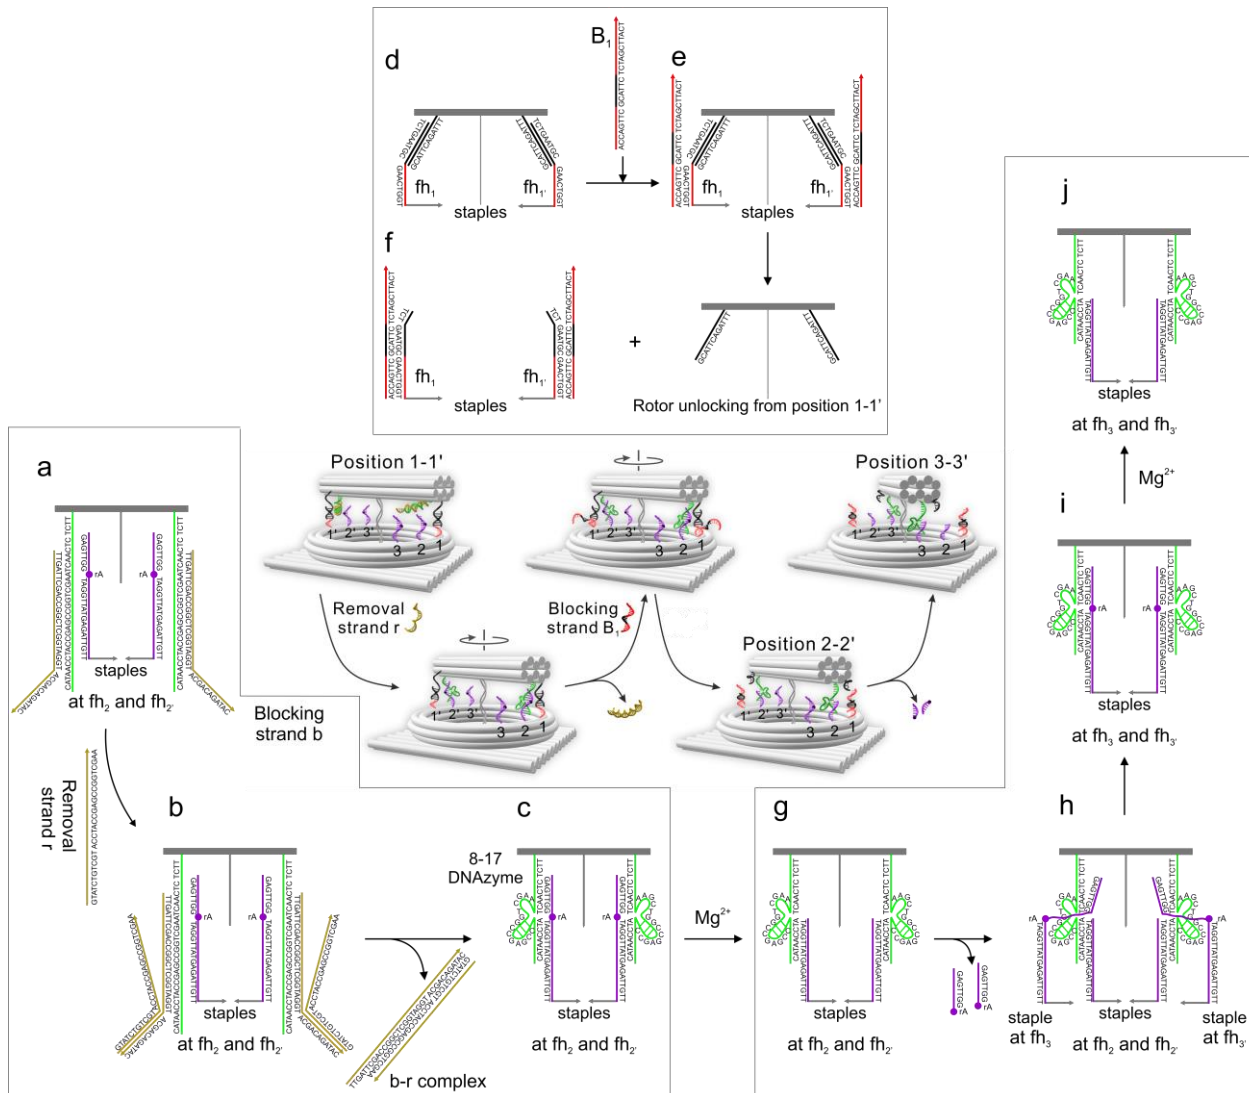

**Supplementary Figure 9** | Schematic illustration of the autonomous rotation from position 1-1' to position 3-3'. Before rotation, feet (green) are blocked by blocking strand b (brown). Each substrate (purple strand) contains a ribonucleotide (purple dot) in sequence at the 8 base from 5' end. Two upper locking strands (black) next to feet hybridize with fh<sub>1</sub> and fh<sub>1</sub>' to fix the rotor at position 1-1'. The autonomous rotation is actuated through two sets of toehold-mediated strand displacement reactions. **(a-c)** Addition of removal strand r (brown), the feet are activated to interact with substrates at fh<sub>2</sub> and fh<sub>2</sub>'. **(d-f)** B<sub>1</sub> is added to break the interactions between the locking strands and free the rotor for autonomous rotation. **(g-j)** In the presence of Mg<sup>2+</sup>, the 8-17 DNAzyme in the foot strands catalyze the hydrolysis of the substrate at the RNA base (rA). The substrates are cut into two short segments (8-nt free segment and 17-nt staple extension). As the free segments diffuse in the solution, the adjacent pair of the intact substrates at fh<sub>3</sub> and fh<sub>3</sub>' are able to interact with the foot strands. Subsequently, the feet will move forward to position 3-3'. The processive rotation is therefore based on the burnt-bridge mechanism.

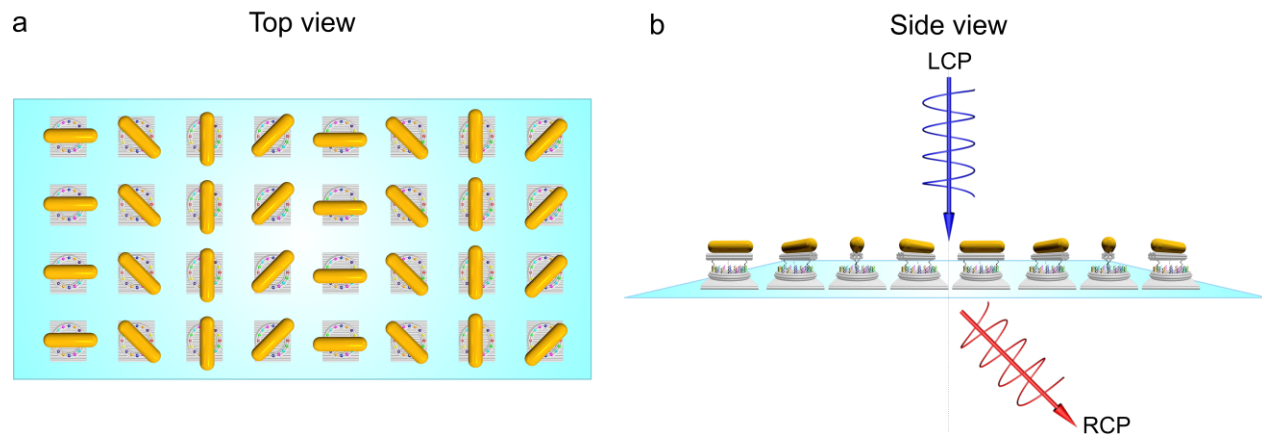

**Supplementary Figure 10** | Visionary scheme of a dynamic optical metasurface, on which the DNA-assembled rotary AuNRs work as individual plasmonic pixels to dynamically shape the wavefront of light. The orientations of these AuNRs could be independently controlled by DNA nanotechnology. For instance, with a linear phase gradient distribution (a), anomalous refraction by the metasurface (b) could be achieved.

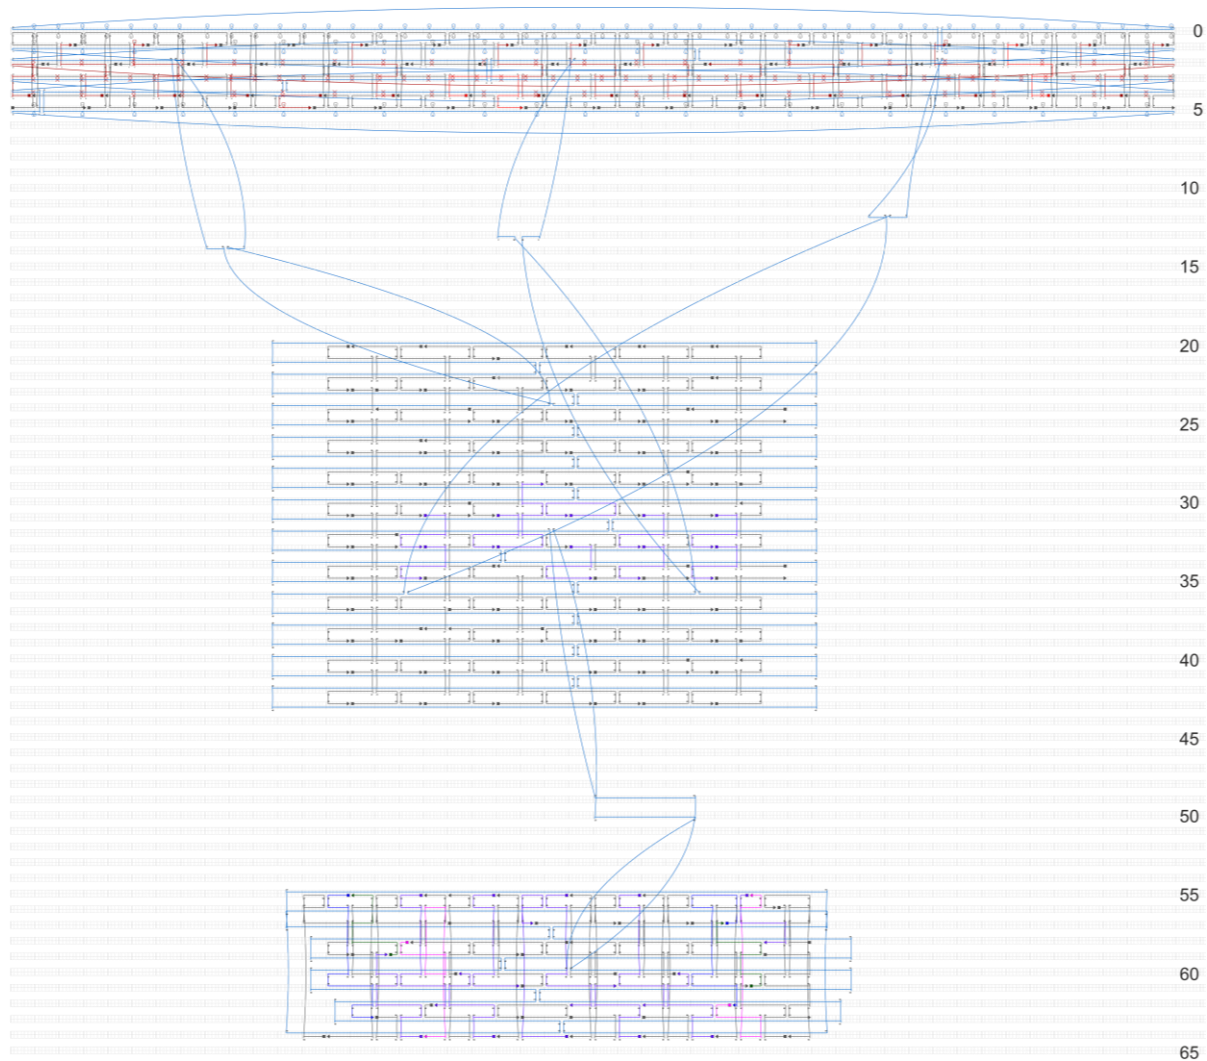

**Supplementary Figure 11** | Strand routing diagram of the DNA origami structure for the autonomous plasmonic nanoclock. Staples for two foot strands (green), two upper locking strands (magenta), 16 footholds (positions for lower locking strands and substrates, red) and 20 capture strands (violet). Two blue strands represent the staples revised in the autonomous design.

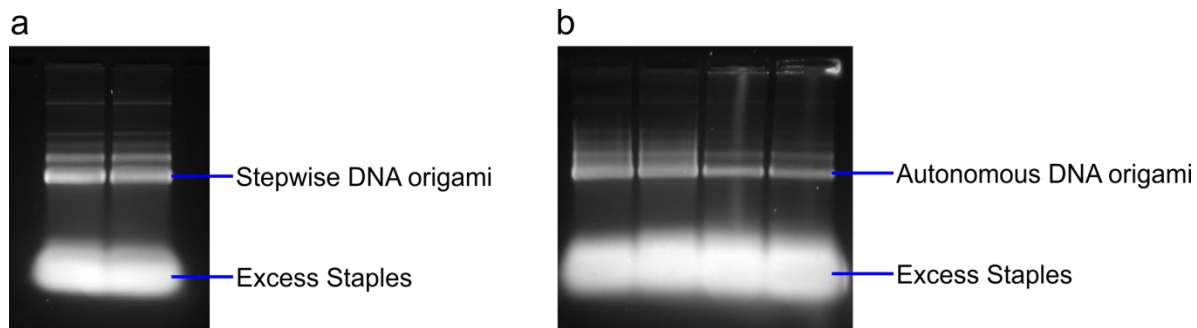

**Supplementary Figure 12** | Characterization and purification of the DNA origami structures by agarose gel electrophoresis. **a**, DNA origami for assembly of the stepwise plasmonic nanoclocks. **b**, DNA origami for assembly of the autonomous plasmonic nanoclocks.

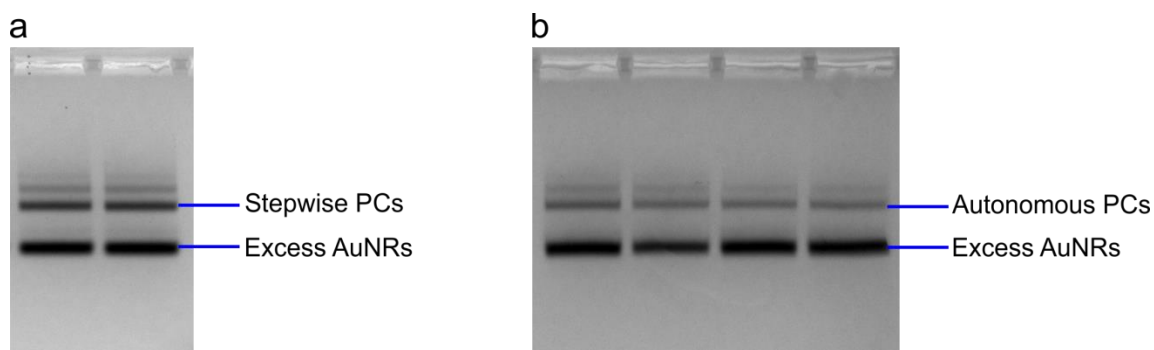

**Supplementary Figure 13** | Characterization and purification of the plasmonic nanoclocks by agarose gel electrophoresis. **a**, Stepwise plasmonic nanoclocks. **b**, Autonomous plasmonic nanoclocks. PCs: plasmonic nanoclocks

**Supplementary Table 1** | Sequences of the stepwise plasmonic nanoclocks.

| Unmodified staples | Sequence (5'-3')              |
|--------------------|-------------------------------|
| 2[135]             | CAAGAGAATCGATGAAGTTTA         |
| 1[270]             | ATTCTTACCAGTATAAAGACC         |
| 57[151]            | CCAGACGTCGGTGGTGCGGTTTCT      |
| 35[99]             | AATAAAGGAACCCATGTACCGAACGCCT  |
| 41[119]            | TCACCCTAGGAAGTTTCCATTACTCATC  |
| 39[98]             | GTTGAAACCATCGCCCACGCAGGAGTTA  |
| 41[203]            | CTTGACAGGAACCGAACTGACAAATCCG  |
| 43[182]            | GATAAATTGTGTCGCAACTTTTCATCAA  |
| 37[203]            | CACATTCGGGAAGAAAAATCTATCATTG  |
| 37[140]            | AAAGTTTTCTGTATGGGATTCCTTTAA   |
| 37[98]             | GTAGCATGAGTGAGAATAGAATTTTCAC  |
| 29[140]            | GTAAAACCGCCACGGGAACGGCAGAAAC  |
| 27[119]            | ATCGCACCTGTTGGGAAGGGCACGCCAG  |
| 39[140]            | TTGTATCTAACAGCTTGATAGAAAGAC   |
| 27[203]            | AAATACAAACCGAGGAAACGCTCTTACC  |
| 39[182]            | TAATTTGACGAGAAACACCAAGGCTGG   |
| 41[140]            | AGCATCGAGGACTAAAGACTTATTATAC  |
| 29[182]            | AATAGCACACAAGAATTGAGTGAGAATA  |
| 35[182]            | ATTACCGCTCATCGAGAACAAAGATTCA  |
| 26[118]            | TGGGATAGGTCACGTTTCGCGTAAAATTC |
| 23[98]             | AAGAGAAGCATTAAATTTTTGGCCATCA  |
| 31[98]             | GTGGTGATAAAAGTTTGAGTAAGAAGGA  |
| 25[98]             | AAAATAATTGGTGTAGATGGGGGACGAC  |
| 27[182]            | CAGTATGACGGAATACCCAAAACAATGA  |
| 25[140]            | ACATTAAGTGGGAACAAACGGAGCTTTC  |
| 37[182]            | TCAGTTGTAAAACGAACTAACGATGGTT  |
| 41[98]             | AAGGCCGTAAAATACGTAATGGGCAAAA  |

|         |                                   |
|---------|-----------------------------------|
| 29[119] | GGTTTTCCACCGGAAACAATCGCTCTCA      |
| 25[182] | GACATTCCAATAGAAAATTCATATTACG      |
| 41[182] | CTGACCTGAAAGAGGACAGATATCGCCT      |
| 60[174] | GTCAATACGATGCTAGAATGCCAACGGC      |
| 2[9]    | TAGCTTTACCCTGACGAAGCAAACCTCCC     |
| 27[140] | CGGCACCTTCGCCATTCAGGCCGACGTT      |
| 39[203] | TGAATTATCAGTGAATAAGGCGAGTAAT      |
| 27[98]  | GACAGTAGCGGGCCTCTTCGCGCAAGGC      |
| 25[203] | GGGAAGGATAAGTTTATTTTGACGTAGA      |
| 23[182] | CCGGAAATTAGAGCCAGCAAAAAGGGC       |
| 20[202] | CCACCAGGGAACCGCCTCCCTGTCAGAC      |
| 29[98]  | GATTAAGCGTACAGCGCCATGTTTCTCC      |
| 33[98]  | GCGGAATATAATGGAAGGGTTAAACAGA      |
| 2[324]  | ACCATAAATCAAAAACATAAAGAAAATTA     |
| 2[240]  | CACTGCGGAATCGTGGATAAATGGGGCGC     |
| 2[93]   | AATACAAAGGCTATATTAATGGTAGCTCA     |
| 2[261]  | CAGTATTCATTGAATAGCCTTGCATCAATT    |
| 2[219]  | AGAACTGGATAGCGTCTCATAACCTGTTTA    |
| 2[156]  | GTTGAGAGGCTTTTGAAGGCTGATTCCCA     |
| 2[30]   | ATCAGTCAGAAGCAACTTCAATAATTGCTC    |
| 2[282]  | CTCCAAATGCTTTAATGTAATAAGCATTAA    |
| 2[303]  | CACCAGAAAACGAGAACCAAATACAGGCAA    |
| 2[51]   | AATTGCATCAAAAAGATATCGCTCATTTTT    |
| 2[114]  | AATATTGCCTGAGAGCAACCGTGCAACTAA    |
| 2[177]  | CCAAAGTTTTGCCAGTAAAGATTAGATTTA    |
| 64[223] | CACACGATGATAGCACCACCAGCAGAAGTCA   |
| 5[87]   | GAATATCCAATCCAATAAACAACATGTTGTC   |
| 5[22]   | TAGAGAAAATTTAATTTTCGAGCCAGTAAGTGT |
| 5[169]  | ATTCTGCAATAGTGTTACGAGCATGTAGAATT  |

|         |                                       |
|---------|---------------------------------------|
| 63[203] | TTTAATGCGCGAACCCAGTAAGTCAAAGTTGC      |
| 5[316]  | GGCAAATAAGAATAATCGCCATATTTAACAGA      |
| 5[127]  | AGTACGCCTCCGGCACAATAGATAAGTCCTAA      |
| 58[230] | ACGTGCCGGCGCTTTCGCCGGGCGCGGGGCG       |
| 5[232]  | GCTATACGCTATTAGAATTACCTTTTTTAATTT     |
| 5[43]   | CTTTTGTAGTTAATATAAAGTACCGACACCAA      |
| 1[144]  | CAAGAGACTACCTTTTTAAGTGTCTGGTCAATAT    |
| 5[211]  | CAAATGAATCCTTGAATTACATTTAACAAAAGA     |
| 1[60]   | GTATTTTTCAAATATATTATAAGAGGGTTTTAA     |
| 5[148]  | TTCCATAAGGTCTGAGAAAAATAATATCCCCCTC    |
| 5[190]  | GTTTGACTIONTAGATTACAATAATCGGGAAAACAAA |
| 5[295]  | CATCCAATTACTAGATCAACAGTAGGGCTTCCGC    |
| 5[64]   | GCGGATGGAGAAAACAAGTAATTCTGTCCAGGTT    |
| 5[106]  | ACATGTAACTATATATGCAGAACGCGCCTCGGT     |
| 1[186]  | AATAGACGCTGAGAAGAGTCGAACGAGTCAAAAG    |
| 1[249]  | AAATGCTTCTGTAAATCGTTTTTCATTAATTTTT    |
| 5[253]  | GAGCTGAAATAACCTCAGTACATAAATCAACGCG    |
| 1[39]   | GAATTTTCATCTTCTGACCTGTACCTTAGCGAACC   |
| 1[102]  | CTAGTAAATGCTGATGCAAATAATGCTCCGGAGA    |
| 1[228]  | TTTATTAATTTTCCCTTAGGTCAATATATTTTAA    |
| 1[333]  | CCATAAATAAGGCGTTAAAGAATTAGCCTAAATC    |
| 1[81]   | CGAGCAAGACAAAGAACGCGCTTAGACGAAAGAC    |
| 1[291]  | CGCAAAGCCTGTTTAGTAATAGTAGTCTTTTGC     |
| 1[123]  | TCATTAGGTTGGGTTATATTTAAATATTCTAGCT    |
| 1[207]  | ATTAACACATAGCGATAGCCATTAGAAGTAATGT    |
| 22[202] | TGTAGCGAATGAAACCATCGACCGACTTGAGCCAT   |
| 1[165]  | TAATAATTTATCAAATCATTAACAGTCGGAGACA    |
| 61[147] | CGTTGGCCGCACAGGCGCCAGCCCGAGGATTGCC    |
| 23[105] | GGATTAGCTGCCTATTTTGATCCTCATTAAAGCCA   |



|         |                                             |
|---------|---------------------------------------------|
| 34[195] | TGCGGGAGCCTAATAAATGAAAACAGGGAAGCGCA         |
| 1[312]  | GAGAAACACCGGAATCATAATAAATCAAACATTAT         |
| 35[203] | CAAATCAAGAGCAACACTAAGTACCGCACGCCAA          |
| 59[98]  | AGTTGAGAATTCCATGGTTCCGGTCCACGCTGGTT         |
| 59[217] | GCTGGCAGCCTCCGTGAGGAAAACCGTCCACCAGT         |
| 43[203] | CGACCTGCTCCATGTCATAAGAGAACCGTGCTCAT         |
| 29[203] | GAAGCCCGCTAATATCAGAGAGATAACCATAGCTA         |
| 59[147] | GTGATGAGCGGCGGGCCGTTTTGGTGCTCATCCCT         |
| 40[195] | TTGCCCTAACTTTAACGTTAAAGATTTAGGAATAC         |
| 39[112] | AAAAAAAGGCTCCATTGCGCCGACAATGGGGATCG         |
| 5[0]    | AGCAATAACCGTGTGAACATGTAATTTAGGCGGTT         |
| 2[202]  | CAACTTAATAGTAAAATATGCCTGTACATTTTCG          |
| 28[195] | AATAATATTAGCAATCACAATAACCGATTGAGGGA         |
| 57[126] | GCCTGTGCACTCTGTCACGGTAATCATGGTCTTTA         |
| 1[18]   | GCATTGGTTTGAAATACCGAAGCAACAGGTCAGGAT        |
| 62[121] | CTGGTATTGGGCGCCAGGCCTGGCAAATCAAGTGTGTT      |
| 55[95]  | TGGCACAACAAAGCATAAAGTGTATTAATGAGCGCGGG      |
| 58[114] | CAGGGGTACCGAGCTCGGTGAAATCCCTTATCCTGAGA      |
| 55[221] | AAAGGTTATCATATCTGGTCAGTTCGAACGACCTAAAA      |
| 60[128] | TGTAATTCGTCATACCGGGGTTTACTGCGCCAGCAAA       |
| 60[191] | ACTCAAACGCGTCTGGTCAGCAGCAGCTTACCTGCGGC      |
| 2[72]   | GATAGGAAGCTTTGAGAGATCTCATATGTACCCCGACGA     |
| 63[147] | TCACCAGTGAGATAACGCTGAGACGCTCACTGCCCTTTCTTT  |
| 34[139] | CAATATACAGATGAATATACAAACGGATTTCGCTGACGATCT  |
| 29[210] | TTTTTAAAGAAGGATACATAACCACGGATAAATATTGACGGA  |
| 20[181] | CCGCCGCACCGGAACCAGAGCATCGGCATTTTCGGAGCAAGG  |
| 24[132] | TGTAAACTGCTCAGCGTATAACTGGTAAGATATTCACAAACA  |
| 38[153] | TGAATTTTGTTCGTCAAACAATGTAACAGTTGCACCCAGCTAT |
| 21[140] | TAACGGGGTCAGGCGCAGGTCAGACGATTGGCCTTTAAGTTT  |

|         |                                                    |
|---------|----------------------------------------------------|
| 63[161] | AGAATACGTGGCACTTCTGACGTTTGGAGGGTAAACATCCCA         |
| 58[160] | AGCACATAGGGTAAAGTTAAAGATAATATGTTCCACTGAAAG         |
| 30[132] | ATAACCTCCAGTCATGCGCAATCCAGCCCGGATTGGCCAGCT         |
| 20[160] | GGTTGAGCATCTTTTCATAATCCCCTTATTAGCGTCGAGAGG         |
| 20[118] | AATAAATGATACAGGAGTGTAACAGTTAATGCCCCGATTAGC         |
| 43[140] | CAAGCGCGAAACAAGGCTTTGGAACGAGAATTTCTGGTTTAT         |
| 41[168] | GGCGCATGAACGAGTAGTATTCGAGGTGGGTAGCAACGACCA         |
| 39[168] | GGCTTGAGGAACAACATTAGTTAGTAAACAGCTTGCTAATTG         |
| 63[182] | ATTTTTGAATGGCTTGGCCAATTAAGATGTTGCCGGCTGGA          |
| 22[139] | CAGTGCCTACCAGGCGGATAAGCAAATATTTAAATTTTCATCA        |
| 43[98]  | GAATACACTAAAACAACGGGCTTTTGCACAACAAATCTCCA          |
| 20[97]  | GAATGGAGCGTCATACATGGCTTTCGGAACCTATTACTCCTC         |
| 23[161] | GTACCATTACCATTTTCATAGCCAAAATCCAGCATTGACAGGA        |
| 39[210] | CCTTATGGGACGTAACTAATCATAGTAGATATAGAAGGCTT          |
| 37[168] | GGTAGAAGCAAGCCGTTTTTCATCGGGAGTTTCCAGACTTACA        |
| 43[168] | TTGTATCGAACGGTGTACAGGCTACAGAAGTACAACGGAGAT         |
| 25[161] | CAGCGCCAAAGACAATCACCAGTAGCTGATATAATCGAGTAA         |
| 24[195] | TTGGGAACGTCACCCGTTTTCCACCACCAACCACCAGAG            |
| 34[223] | GCGAGGCGTTTTAGATAAACACGATTTTGGAGAATATTGAGC         |
| 27[161] | AAATTAAGACTCCTTATGGTTTACCAACCCGTCGGGTGCCGG         |
| 23[119] | GGGGTTTGTTAATATTTTGTCTGGCCTTCTGTAACCGTAA           |
| 35[119] | TTCAGGTTGAATACCAAGTGCACAGCCCTCATAGTCAACTTT         |
| 29[161] | AGTAAGAGCAAGAAAGAACTGGCATGACCAGGCAAAGTGCCA         |
| 5[274]  | CTACTATCATATGCGTTATATATGTGAGTGAAAGGTGTATTTCAA      |
| 63[105] | GAGAGGCAGCAAGCGAAATCGCGGCATCTCCAGCGCAGTGTCCTGC     |
| 32[111] | TTAATTTAGGGATAGGCGAAATTGGGTAGATCGGTTCCGGCCTCAGGAAG |
| 38[118] | CAACAGTTTCAGCGTCCACAGCCAATAGAAATTGCCTTCTGATATCATC  |
| 57[196] | GGTGTCCGGTGCTGGGTCCGTTTTTTTCGTCTTTAGCTCCAACATAAAGG |
| 57[175] | CGCAACCAACCGCAGATTGCCGTTCCGGAATAGATTCCACTACAGAGAT  |

|                        |                                                          |
|------------------------|----------------------------------------------------------|
| 24[223]                | AATTATCACCGTCATAGCAGCCTTTAGCCAGAGCCCACCCCTCAGAGCCG       |
| 37[126]                | TAGCGTAATTGCTTTTAAACGTATCCTGACAGATGAAAATCCTAGAGACG       |
| 64[90]                 | TGCCCAATCCTGTCTGCAGCGGTGCCCCCTGCATCTTCGCGTCCTCAC         |
| 43[119]                | TTTGACCCCCAGCGTTTCATGCAGCAGCCCGATAGAAAGGAGTGCTAAA        |
| 35[168]                | TCATCGTAAATCAAGCTAACGCAGCCAGCAGTTGGGCGGTTCATGAATCT       |
| 28[153]                | AGCGCCAGCTTCTGATTCTCCATGTGAGTGTATAAGTGCCGTTTTGCCTTGAGTAA |
| Capture strands        | Sequence (5'-3')                                         |
| 31[119]                | AAAAAAAAA CGGAAAATTGCCCGAACGTTAATATTCC                   |
| 31[140]                | AAAAAAAAA AGCGGATCGACAACCTCGTATTTGGCAAT                  |
| 31[161]                | AAAAAAAAA TGCTCATTTGCCGATAAGCCCAATAACTTTCAGAGAAATTTTC    |
| 31[182]                | AAAAAAAAA ACATAAAAATAGCAGCCTTTAAGCGTCT                   |
| 31[203]                | AAAAAAAAA TTAGACGTTGTTTAAACGTCAATTGCCAG                  |
| 33[119]                | AAAAAAAAA TGATTATTTGTTTGGATTATAGTAGATT                   |
| 33[140]                | AAAAAAAAA TCACAATTTTATCCAACAATTCAAACCTGTGGAGCGACGGCC     |
| 33[161]                | AAAAAAAAA TACCAACGATTAGTTGCTATTTACCTTTTATATTT            |
| 33[182]                | AAAAAAAAA TTCCAGAGGTTTTGAAGCCTTAGGAATC                   |
| 33[203]                | AAAAAAAAA TTACAAACGAACCTCCCGACTTAGCAAG                   |
| 56[118]                | AAAAAAAAA TCGTTAAGCAAATTGTTATCGGGTGCCTAATGAGAAAC         |
| 56[139]                | AAAAAAAAA TACTACTGAAGAATATAGCTGTACTCACATTAATTG           |
| 56[160]                | AAAAAAAAA TTGCTCGTGAGTGTAAAAAGCCAGCAGCAAATGAACAGTGCC     |
| 56[181]                | AAAAAAAAA TGGTAATACAAGAGTAGAGCCAAGCATCACCTTGCCAGTATT     |
| 56[202]                | AAAAAAAAA GGGTCACACGTGGAGAGCACTCAAATATCAAACCCATAAAAC     |
| 64[118]                | AAAAAAAAA GAGTTGCGGTTTGCTCGTGCCAGCTGCAAAGCCTGCGCTCACGATC |
| 64[139]                | AAAAAAAAA CTTACCCGGTGGTTGCTTTCCAGTCGGGTGAGCTATTCC        |
| 64[160]                | AAAAAAAAA CGCGGGCAACAGCTATAGGGTTCATAAAGCGG               |
| 64[181]                | AAAAAAAAA AGAACCCAGACAATAACACCCGCCTGCAAAAATCTA           |
| 64[202]                | AAAAAAAAA GACATTCATTAGTCAGAGGTGAGGCGGTTGAACCTAACA        |
| Footholds              | Sequence (5'-3')                                         |
| 4[5] fh <sub>3</sub> ' | TCTGAATGCTGGATCTC TCAGAGTCAGGTTACCGCCACCCCTCAACG         |

|                         |                                                             |
|-------------------------|-------------------------------------------------------------|
| 4[26] fh <sub>4'</sub>  | TCTGAATGCGACTCTAA AGACCGTATTATACCGTACTCAGGAAGAG             |
| 4[47] fh <sub>5'</sub>  | TCTGAATGCGACGAGTT TTCGAGAGCGGAACGCCCGGAATAGTAAGA            |
| 4[68] fh <sub>6'</sub>  | TCTGAATGCGGTCTAAT TTCAAATTAAGAATCAGAAAAGCCAAAG              |
| 4[89] fh <sub>7'</sub>  | TCTGAATGCTAGAAGTC GGGTAGCTATTCGCTTAATTGCT                   |
| 4[110] fh <sub>8'</sub> | TCTGAATGCAATAGTCC GATAACAGGTCCGTAAAAGTACTAGCATCAG           |
| 4[131] fh <sub>1</sub>  | TCTGAATGCGAACTGGT GATATTTCTGGAGCAAAAAACCAAATCACCAAAGTTTCA   |
| 4[152] fh <sub>2</sub>  | TCTGAATGCGACGCAAGG GTCAAATAGCTACCAGACGACGATGAA              |
| 4[173] fh <sub>3</sub>  | TCTGAATGCTGGATCTC GGTGAGCAAAAGAGAACGGGTATTCATCC             |
| 4[194] fh <sub>4</sub>  | TCTGAATGCGACTCTAA GTAGGAGGGGGGTCTTTCCTTATCAACC              |
| 4[215] fh <sub>5</sub>  | TCTGAATGCGACGAGTT ATGCAGTTTAGTGATGAAACAAACAT                |
| 4[236] fh <sub>6</sub>  | TCTGAATGCGGTCTAAT AGAACCCCAATAATTACCTGAGCAATTTCA            |
| 4[257] fh <sub>7</sub>  | TCTGAATGCTAGAAGTC CGCAACATAAAAGGCGAATTATTCATGG              |
| 4[278] fh <sub>8</sub>  | TCTGAATGCAATAGTCC GGGAGACCCCTATTTTCAGGAATTACAA              |
| 4[299] fh <sub>1'</sub> | TCTGAATGCGAACTGGT GACCCACAGTTCCTCAGAGCCACCCCAA              |
| 4[320] fh <sub>2'</sub> | TCTGAATGCGACGCAAGG GGTGTATGACCGCCACCCTCAGAAAATT             |
| Feet                    | Sequence (5'-3')                                            |
| 59[109]F1N              | GCATTCAGATTT CCCCACGCGTGCCTGTTTCAGACGAAGATGCCGGGTTACTTGA    |
| 61[213]F2N              | GCATTCAGATTT ATCATAAAATATCTCGTCTAGAACGTCAGCGTAGCATCAATGAGCC |
| Blocking strands        | Sequence (5'-3')                                            |
| B <sub>1</sub>          | ACCAGTTCGCATTCTCTAGCTTACT                                   |
| B <sub>2</sub>          | CCTTGCGTGCATTCTCTCCTTATCG                                   |
| B <sub>3</sub>          | GAGATCCAGCATTCTTTGTACGAAC                                   |
| B <sub>4</sub>          | TTAGAGTCGCATTCTATTAGCAACG                                   |
| B <sub>5</sub>          | AACTCGTCGCATTCTCTCACTAATT                                   |
| B <sub>6</sub>          | ATTAGACCGCATTCTTTGAGTTCCG                                   |
| B <sub>7</sub>          | GACTTCTAGCATTCTTCACTTTCA                                    |
| B <sub>8</sub>          | GGACTATTGCATTGTTGTAGATCC                                    |
| Removal strands         | Sequence (5'-3')                                            |
| R <sub>1</sub>          | AGTAAGCTAGAGAATGCGAACTGGT                                   |

|                |                           |
|----------------|---------------------------|
| R <sub>2</sub> | CGATAAGGAGAGAATGCACGCAAGG |
| R <sub>3</sub> | GTTCGTACAAAGAATGCTGGATCTC |
| R <sub>4</sub> | CGTTGCTAATAGAATGCGACTCTAA |
| R <sub>5</sub> | AATTAGTGAGAGAATGCGACGAGTT |
| R <sub>6</sub> | CGGAACTCAAAGAATGCGGTCTAAT |
| R <sub>7</sub> | TGAAAGTGAAGGAATGCTAGAAGTC |
| R <sub>8</sub> | GGATCTACAACGAATGCAATAGTCC |

**Supplementary Table 2** | Additions of blocking and removal strands for a full-turn clockwise rotation. All the fuel strands have a concentration of 250 $\mu$ M. So do those in Supplementary Table 3 and 4.

| Steps              | Strands added                                             | Steps               | Strands added                                             |
|--------------------|-----------------------------------------------------------|---------------------|-----------------------------------------------------------|
| 1 $\rightarrow$ 2  | 0.4 $\mu$ L B <sub>1</sub> and 0.4 $\mu$ L R <sub>2</sub> | 1' $\rightarrow$ 2' | 1.2 $\mu$ L B <sub>1</sub> and 0.8 $\mu$ L R <sub>2</sub> |
| 2 $\rightarrow$ 3  | 0.8 $\mu$ L B <sub>2</sub> and 0.4 $\mu$ L R <sub>3</sub> | 2' $\rightarrow$ 3' | 1.2 $\mu$ L B <sub>2</sub> and 0.8 $\mu$ L R <sub>3</sub> |
| 3 $\rightarrow$ 4  | 0.8 $\mu$ L B <sub>3</sub> and 0.4 $\mu$ L R <sub>4</sub> | 3' $\rightarrow$ 4' | 1.2 $\mu$ L B <sub>3</sub> and 0.8 $\mu$ L R <sub>4</sub> |
| 4 $\rightarrow$ 5  | 0.8 $\mu$ L B <sub>4</sub> and 0.4 $\mu$ L R <sub>5</sub> | 4' $\rightarrow$ 5' | 1.2 $\mu$ L B <sub>4</sub> and 0.8 $\mu$ L R <sub>5</sub> |
| 5 $\rightarrow$ 6  | 0.8 $\mu$ L B <sub>5</sub> and 0.4 $\mu$ L R <sub>6</sub> | 5' $\rightarrow$ 6' | 1.2 $\mu$ L B <sub>5</sub> and 0.8 $\mu$ L R <sub>6</sub> |
| 6 $\rightarrow$ 7  | 0.8 $\mu$ L B <sub>6</sub> and 0.4 $\mu$ L R <sub>7</sub> | 6' $\rightarrow$ 7' | 1.2 $\mu$ L B <sub>6</sub> and 0.8 $\mu$ L R <sub>7</sub> |
| 7 $\rightarrow$ 8  | 0.8 $\mu$ L B <sub>7</sub> and 0.4 $\mu$ L R <sub>8</sub> | 7' $\rightarrow$ 8' | 1.2 $\mu$ L B <sub>7</sub> and 0.8 $\mu$ L R <sub>8</sub> |
| 8 $\rightarrow$ 1' | 0.8 $\mu$ L B <sub>8</sub> and 0.8 $\mu$ L R <sub>1</sub> | 8' $\rightarrow$ 1  | 1.2 $\mu$ L B <sub>8</sub> and 1.2 $\mu$ L R <sub>1</sub> |

**Supplementary Table 3** | Additions of blocking and removal strands for the plasmonic nanoclock from position 5-5' to position 5'-5 during the time-course CD measurements.

| Steps               | Strands added                                             |
|---------------------|-----------------------------------------------------------|
| 5 $\rightarrow$ 6   | 0.4 $\mu$ L B <sub>5</sub> and 0.4 $\mu$ L R <sub>6</sub> |
| 6 $\rightarrow$ 7   | 0.8 $\mu$ L B <sub>6</sub> and 0.4 $\mu$ L R <sub>7</sub> |
| 7 $\rightarrow$ 8   | 0.8 $\mu$ L B <sub>7</sub> and 0.4 $\mu$ L R <sub>8</sub> |
| 8 $\rightarrow$ 1'  | 0.8 $\mu$ L B <sub>8</sub> and 0.4 $\mu$ L R <sub>1</sub> |
| 1' $\rightarrow$ 2' | 0.8 $\mu$ L B <sub>1</sub> and 0.4 $\mu$ L R <sub>2</sub> |
| 2' $\rightarrow$ 3' | 0.8 $\mu$ L B <sub>2</sub> and 0.4 $\mu$ L R <sub>3</sub> |
| 3' $\rightarrow$ 4' | 0.8 $\mu$ L B <sub>3</sub> and 0.4 $\mu$ L R <sub>4</sub> |
| 4' $\rightarrow$ 5' | 0.8 $\mu$ L B <sub>4</sub> and 0.8 $\mu$ L R <sub>5</sub> |

**Supplementary Table 4** | Additions of blocking and removal strands for a 15-step counterclockwise rotation followed by a 9-step clockwise rotation.

| Counterclockwise Steps | Strands added                                   | Clockwise Steps | Strands added                                   |
|------------------------|-------------------------------------------------|-----------------|-------------------------------------------------|
| 1 → 8'                 | 0.4 μL B <sub>1</sub> and 0.4 μL R <sub>8</sub> | 2 → 3           | 1.2 μL B <sub>2</sub> and 1.6 μL R <sub>3</sub> |
| 8' → 7'                | 0.8 μL B <sub>8</sub> and 0.4 μL R <sub>7</sub> | 3 → 4           | 2 μL B <sub>3</sub> and 1.6 μL R <sub>4</sub>   |
| 7' → 6'                | 0.8 μL B <sub>7</sub> and 0.4 μL R <sub>6</sub> | 4 → 5           | 2 μL B <sub>4</sub> and 1.6 μL R <sub>5</sub>   |
| 6' → 5'                | 0.8 μL B <sub>6</sub> and 0.4 μL R <sub>5</sub> | 5 → 6           | 2 μL B <sub>5</sub> and 1.6 μL R <sub>6</sub>   |
| 5' → 4'                | 0.8 μL B <sub>5</sub> and 0.4 μL R <sub>4</sub> | 6 → 7           | 2 μL B <sub>6</sub> and 1.6 μL R <sub>7</sub>   |
| 4' → 3'                | 0.8 μL B <sub>4</sub> and 0.4 μL R <sub>3</sub> | 7 → 8           | 2 μL B <sub>7</sub> and 1.6 μL R <sub>8</sub>   |
| 3' → 2'                | 0.8 μL B <sub>3</sub> and 0.4 μL R <sub>2</sub> | 8 → 1'          | 2 μL B <sub>8</sub> and 1.6 μL R <sub>1</sub>   |
| 2' → 1'                | 0.8 μL B <sub>2</sub> and 0.8 μL R <sub>1</sub> | 1' → 2'         | 2 μL B <sub>1</sub> and 1.6 μL R <sub>2</sub>   |
| 1' → 8                 | 1.2 μL B <sub>1</sub> and 0.8 μL R <sub>8</sub> | 2' → 3'         | 2 μL B <sub>2</sub> and 2.4 μL R <sub>3</sub>   |
| 8 → 7                  | 1.2 μL B <sub>8</sub> and 0.8 μL R <sub>7</sub> |                 |                                                 |
| 7 → 6                  | 1.2 μL B <sub>7</sub> and 0.8 μL R <sub>6</sub> |                 |                                                 |
| 6 → 5                  | 1.2 μL B <sub>6</sub> and 0.8 μL R <sub>5</sub> |                 |                                                 |
| 5 → 4                  | 1.2 μL B <sub>5</sub> and 0.8 μL R <sub>4</sub> |                 |                                                 |
| 4 → 3                  | 1.2 μL B <sub>4</sub> and 0.8 μL R <sub>3</sub> |                 |                                                 |
| 3 → 2                  | 1.2 μL B <sub>3</sub> and 0.8 μL R <sub>2</sub> |                 |                                                 |

**Supplementary Table 5** | Track arrangements of the autonomous plasmonic nanoclocks for clockwise rotation.

|                        | Locking strands                       | Substrates                                                                 |
|------------------------|---------------------------------------|----------------------------------------------------------------------------|
| Position 1-2           | fh <sub>1</sub> and fh <sub>1</sub> ' | @ fh <sub>2</sub> and fh <sub>2</sub> '                                    |
| Position 1-2-3         | fh <sub>1</sub> and fh <sub>1</sub> ' | @ fh <sub>2</sub> -fh <sub>3</sub> and fh <sub>2</sub> '-fh <sub>3</sub> ' |
| Position 1-2-3-4       | fh <sub>1</sub> and fh <sub>1</sub> ' | @ fh <sub>2</sub> -fh <sub>4</sub> and fh <sub>2</sub> '-fh <sub>4</sub> ' |
| Position 1-2-3-4-5     | fh <sub>1</sub> and fh <sub>1</sub> ' | @ fh <sub>2</sub> -fh <sub>5</sub> and fh <sub>2</sub> '-fh <sub>5</sub> ' |
| Position 1-2-3-4-5-6   | fh <sub>1</sub> and fh <sub>1</sub> ' | @ fh <sub>2</sub> -fh <sub>6</sub> and fh <sub>2</sub> '-fh <sub>6</sub> ' |
| Position 1-2-3-4-5-6-7 | fh <sub>1</sub> and fh <sub>1</sub> ' | @ fh <sub>2</sub> -fh <sub>7</sub> and fh <sub>2</sub> '-fh <sub>7</sub> ' |

**Supplementary Table 6** | Track arrangements of the autonomous plasmonic nanoclocks with open sites.

|                    | Locking strands                       | Substrates                                                                                                      |
|--------------------|---------------------------------------|-----------------------------------------------------------------------------------------------------------------|
| Position 1-2-3-x-5 | fh <sub>1</sub> and fh <sub>1</sub> ' | @ fh <sub>2</sub> -fh <sub>3</sub> , fh <sub>5</sub> and fh <sub>2</sub> '-fh <sub>3</sub> ', fh <sub>5</sub> ' |
| Position 1-2-x-x-5 | fh <sub>1</sub> and fh <sub>1</sub> ' | @ fh <sub>2</sub> , fh <sub>5</sub> and fh <sub>2</sub> ', fh <sub>5</sub> '                                    |

**Supplementary Table 7** | Track arrangements of the autonomous plasmonic nanoclocks for counterclockwise rotation.

|                              | Locking strands                       | Substrates                                                                 |
|------------------------------|---------------------------------------|----------------------------------------------------------------------------|
| Position 1-8'                | fh <sub>1</sub> and fh <sub>1</sub> ' | @ fh <sub>8</sub> and fh <sub>8</sub> '                                    |
| Position 1-8'-7'             | fh <sub>1</sub> and fh <sub>1</sub> ' | @ fh <sub>8</sub> -fh <sub>7</sub> and fh <sub>8</sub> '-fh <sub>7</sub> ' |
| Position 1-8'-7'-6'          | fh <sub>1</sub> and fh <sub>1</sub> ' | @ fh <sub>8</sub> -fh <sub>6</sub> and fh <sub>8</sub> '-fh <sub>6</sub> ' |
| Position 1-8'-7'-6'-5'       | fh <sub>1</sub> and fh <sub>1</sub> ' | @ fh <sub>8</sub> -fh <sub>5</sub> and fh <sub>8</sub> '-fh <sub>5</sub> ' |
| Position 1-8'-7'-6'-5'-4'    | fh <sub>1</sub> and fh <sub>1</sub> ' | @ fh <sub>8</sub> -fh <sub>4</sub> and fh <sub>8</sub> '-fh <sub>4</sub> ' |
| Position 1-8'-7'-6'-5'-4'-3' | fh <sub>1</sub> and fh <sub>1</sub> ' | @ fh <sub>8</sub> -fh <sub>3</sub> and fh <sub>8</sub> '-fh <sub>3</sub> ' |



**Supplementary Table 8** | Sequences of the functional strands for autonomous rotation.

| Substrate_ footholds     | Sequence (5'-3')                                                             |
|--------------------------|------------------------------------------------------------------------------|
| 4[5] Sub <sub>3'</sub>   | GAGTTGG rA TAGGTTATGAGATTGTT TCAGAGTCAGGTTACCGCCACCCTCAACG                   |
| 4[26] Sub <sub>4'</sub>  | GAGTTGG rA TAGGTTATGAGATTGTT AGACCGTATTATACCGTACTCAGGAAGAG                   |
| 4[47] Sub <sub>5'</sub>  | GAGTTGG rA TAGGTTATGAGATTGTT TTCGAGAGCGGAACGCCCGGAATAGTAAGA                  |
| 4[68] Sub <sub>6'</sub>  | GAGTTGG rA TAGGTTATGAGATTGTT TTCAAATTAAGAATCAGAAAAGCCAAAG                    |
| 4[89] Sub <sub>7'</sub>  | GAGTTGG rA TAGGTTATGAGATTGTT GGGTAGCTATTCGCTTAATTGCT                         |
| 4[110] Sub <sub>8'</sub> | GAGTTGG rA TAGGTTATGAGATTGTT GATAACAGGTCCGTA AAACTAGCATCAG                   |
| 4[152] Sub <sub>2</sub>  | GAGTTGG rA TAGGTTATGAGATTGTT GTCAAAATAGCTACCAGACGACGATGAA                    |
| 4[173] Sub <sub>3</sub>  | GAGTTGG rA TAGGTTATGAGATTGTT GGTGAGCAAAAAGAGAACGGGTATTCATCC                  |
| 4[194] Sub <sub>4</sub>  | GAGTTGG rA TAGGTTATGAGATTGTT GTAGGAGGGGGTCTTTCCTTATCAACC                     |
| 4[215] Sub <sub>5</sub>  | GAGTTGG rA TAGGTTATGAGATTGTT ATGCAGTTTAGTGATGAAACAAACAT                      |
| 4[236] Sub <sub>6</sub>  | GAGTTGG rA TAGGTTATGAGATTGTT AGAACCCCAATAATTACCTGAGCAATTTCA                  |
| 4[257] Sub <sub>7</sub>  | GAGTTGG rA TAGGTTATGAGATTGTT CGCAACATAAAAAGGCGAATTATTCATGG                   |
| 4[278] Sub <sub>8</sub>  | GAGTTGG rA TAGGTTATGAGATTGTT GGGAGACCCCCTATTTTCAGGGAATTACAA                  |
| 4[320] Sub <sub>2'</sub> | GAGTTGG rA TAGGTTATGAGATTGTT GGTGTATGACCGCCACCCTCAGAAAATT                    |
| DNAzyme_feet             | Sequence (5'-3')                                                             |
| 59[109]                  | CATAACCTA CCGAGCCGGTCGAATCAACTC TCTT<br>CCCCACGCGTGCCTGTT CAGACGAAGATGCC     |
| 61[213]                  | CATAACCTA CCGAGCCGGTCGAATCAACTC TCTT<br>ATCATAAAAATATCTCGTCTAGAACGTCAGCGTAGC |
| 58[114]locking2          | GCATTCAGATTT CAGGGGTACCGAGCTCGGTGAAATCCCTTATCCTGAGA                          |
| 62[206]locking1          | GCATTCAGATTT AAAC TTTAATGCGCGAACCCAGTAAGTCAAAGTTGC                           |
| Removal strand r         | GTATCTGTCGT ACCTACCGAGCCGGTTCGAA                                             |
| Blocking strand b        | TTGATTTCGACCGGCTCGGTAGGT ACGACAGATAC                                         |
| Revised staples          | Sequence (5'-3')                                                             |
| 56[97]                   | GGGTTACTTGATGGCACAACAAAGCATAAAGTGTATTAATGAGCGCGGG                            |
| 57[206]                  | ATCAATGAGCCGGGTCACACGTGGAGAGCACTCAAATATCAAACCCATA                            |
| 56[212]                  | AAAAAAAAA GGTGCGGGGTCATTGCAGGACTTG                                           |

**Supplementary Table 9** | Additions of the trigger strands to actuate the autonomous plasmonic nanoclocks.

| Steps | Strands added                          |
|-------|----------------------------------------|
| 1     | 100 $\mu$ M 1 $\mu$ L removal strand r |
| 2     | 250 $\mu$ M 0.5 $\mu$ L B <sub>1</sub> |
